# Supplementary material
Source: PubMed Central journal article supplement (PMC1360194)

## SUPPLEMENTARY RESULTS

### Supplementary Figure Legends

**Figure S1. Comparison of Tube-Gel digestion of myoglobin in the presence of (Blue) and absence (Red) of 2% SDS. (A).** Base peak chromatography of digestion products of 26 ng (~1.4 pico-moles) myoglobin using the above two digestion protocols. Mass spectra of two representative peptides are shown. **(B).** VEADIAGHGQEVLR (536.26, 2+). **(C).** HGTVVLTALGGILK (689.69, 2+). It is evident that the Tube-Gel digestion protocol produced more detectable peptides with greater intensity in mass spectra.

**Figure S2. Comparison of Tube-Gel digestion of Bacteriorhodopsin in the presence (Blue) and absence (Red) of 2% SDS. (A).** Base peak chromatography of digestion products of 20 ng (~ 700 femto-moles) of bacteriorhodopsin using the above two protocols. Mass spectra of two representative peptides are shown in panels B and C. **(B).** AIFGEAEAPEPSAGDGAAATS (950.91, 2+). **(C).** VGFGILLR (494.31, 2+). More peptides were detected with great intensity in mass spectra when the sample was prepared by Tube-Gel digestion protocol in the presence of 2% SDS.

**Supplementary Table S1. Proteins identified in the membrane fraction of PC-3 cells.**

Method A: Tube-Gel digestion followed by one LC-MS/MS analysis.

Method B: SDS-PAGE followed by 20 LC-MS/MS analysis.

|    | <b>Protein</b>                                                                  | <b>Accession #</b> | <b># of TMDs</b> | <b>Method A:<br/>Seq.<br/>coverage, %<br/>/ peptide #</b> | <b>Method B:<br/>Seq.<br/>coverage, %<br/>/ peptide #</b> |
|----|---------------------------------------------------------------------------------|--------------------|------------------|-----------------------------------------------------------|-----------------------------------------------------------|
| 1  | 4F2 heavy chain antigen                                                         | AAA35489           | 1                | 33% / 15                                                  | 32% / 14                                                  |
| 2  | ACTB protein                                                                    | AAH12854           | 0                | 43% / 11                                                  | 20% / 6                                                   |
| 3  | Acyl-CoA synthetase long-chain family member 3                                  | AAH41692           | 1                | 15% / 8                                                   | 11% / 7                                                   |
| 4  | ADP-ribosylation factor-like 10C                                                | NP_080287          | 0                | 17% / 4                                                   | 15% / 4                                                   |
| 5  | alpha-actinin 1                                                                 | FAHUAA             | 0                | 5% / 5                                                    | 7% / 6                                                    |
| 6  | androgen-regulated short-chain dehydrogenase/reductase 1                        | AAF89632           | 0                | 15% / 4                                                   | 30% / 8                                                   |
| 7  | ATPase, Ca <sup>++</sup> transporting, cardiac muscle, slow twitch 2, isoform 1 | AAH35588           | 8                | 24% / 20                                                  | 19% / 15                                                  |
| 8  | B-cell receptor associated protein                                              | AAC51639           | 2                | 25% / 4                                                   | 18% / 4                                                   |
| 9  | B-ind1 protein                                                                  | CAB69070           | 5                | 9% / 4                                                    | 5% / 2                                                    |
| 10 | BiP protein                                                                     | AAF13605           | 0                | 39% / 20                                                  | 56% / 40                                                  |
| 11 | CANX protein                                                                    | AAH42843           | 1                | 43% / 20                                                  | 35% / 23                                                  |
| 12 | carnitine palmitoyltransferase 1A                                               | NP_001867          | 2                | 5% / 3                                                    | 4% / 4                                                    |
| 13 | Cation-independent mannose-6-phosphate receptor precursor                       | P11717             | 1                | 7% / 18                                                   | 5% / 13                                                   |
| 14 | Chromosome 10 open reading frame 69                                             | AAH31791           | 1                | 9% / 3                                                    | 9% / 2                                                    |
| 15 | cytochrome P450 reductase                                                       | AAB21814           | 1                | 19% / 10                                                  | 11% / 7                                                   |
| 16 | cytoskeleton-associated protein 4                                               | NP_006816          | 1                | 33% / 16                                                  | 59% / 28                                                  |
| 17 | DHCR7 protein                                                                   | AAH00054           | 6                | 17% / 7                                                   | 12% / 5                                                   |
| 18 | dihydrolipoamide S-acetyltransferase                                            | XXHU               | 0                | 6% / 3                                                    | 5% / 3                                                    |
| 19 | DKFZP564J0863 protein                                                           | AAH77727           | 2                | 23% / 7                                                   | 20% / 10                                                  |
| 20 | dolichyl-diphosphooligosaccharide-protein glycosyltransferase                   | BAB93478           | 2                | 22% / 8                                                   | 7% / 3                                                    |
| 21 | EMMPRIN                                                                         | BAB88938           | 2                | 24% / 7                                                   | 20% / 5                                                   |
| 22 | Ephrin receptor EphA2                                                           | AAH37166           | 1                | 14% / 13                                                  | 6% / 5                                                    |
| 23 | epican                                                                          | CAA47271           | 1                | 11% / 8                                                   | 5% / 3                                                    |
| 24 | epidermal growth factor receptor precursor                                      | GQHUE              | 2                | 14% / 17                                                  | 12% / 14                                                  |
| 25 | GANAB protein                                                                   | AAH65266           | 0                | 8% / 5                                                    | 13% / 12                                                  |
| 26 | GK001 protein                                                                   | NP_064583          | 0                | 16% / 8                                                   | 6% / 3                                                    |
| 27 | GLG1 protein                                                                    | AAH60822           | 1                | 9% / 9                                                    | 3% / 5                                                    |
| 28 | guanine nucleotide binding protein (G protein), beta polypeptide 1              | AAP35969           | 0                | 9% / 2                                                    | 15% / 6                                                   |
| 29 | guanine nucleotide-binding regulatory protein                                   | AAA52556           | 0                | 23% / 6                                                   | 2% / 2                                                    |
| 30 | H4 histone family, member M                                                     | NP_003486          | 0                | 29% / 3                                                   | 21% / 2                                                   |

|    |                                                                 |           |    |          |          |
|----|-----------------------------------------------------------------|-----------|----|----------|----------|
| 31 | Heat shock 70kDa protein 8, isoform 1                           | AAH16660  | 0  | 34% / 15 | 36% / 20 |
| 32 | heat shock protein 90-beta                                      | HHHU84    | 0  | 12% / 10 | 19% / 16 |
| 33 | hexokinase 1 isoform HKI-ta/tb; brain form hexokinase           | NP_277033 | 0  | 10% / 11 | 16% / 14 |
| 34 | hnRNP U protein                                                 | CAA46472  | 0  | 12% / 9  | 9% / 5   |
| 35 | hypothetical protein                                            | CAB66585  | 0  | 20% / 4  | 11% / 2  |
| 36 | hypothetical protein DKFZp564E1962.1                            | T12471    | 3  | 16% / 5  | 22% / 8  |
| 37 | Hypothetical protein MGC5508                                    | AAH01309  | 5  | 4% / 1   | 16% / 5  |
| 38 | Inner membrane protein, mitochondrial; motor protein;mitofilin, | NP_006830 | 0  | 6% / 4   | 20% / 14 |
| 39 | integrin beta 1 isoform 1A precursor                            | NP_002202 | 1  | 28% / 18 | 18% / 14 |
| 40 | integrin beta 4                                                 | CAB61345  | 1  | 6% / 11  | 4% / 6   |
| 41 | integrin, alpha 2 (CD49B, alpha 2 subunit of VLA-2 receptor)    | AAM34795  | 2  | 16% / 15 | 22% / 20 |
| 42 | KIAA0152 gene product                                           | AAH16297  | 1  | 16% / 8  | 22% / 6  |
| 43 | KIAA0253                                                        | BAA13383  | 1  | 7% / 4   | 12% / 5  |
| 44 | kinectin 1 - human                                              | S32763    | 1  | 34% / 37 | 27% / 30 |
| 45 | Lectin, mannose-binding 2                                       | AAH17263  | 1  | 28% / 9  | 9% / 3   |
| 46 | low density lipoprotein receptor precursor                      | NP_000518 | 1  | 5% / 5   | 8% / 7   |
| 47 | LYRIC/3D3                                                       | AAH45642  | 1  | 12% / 5  | 44% / 21 |
| 48 | lysosomal integral membrane protein II                          | A56525    | 2  | 14% / 4  | 5% / 3   |
| 49 | MBC2 protein                                                    | AAH13880  | 0  | 10% / 7  | 5% / 5   |
| 50 | Melanoma cell adhesion molecule                                 | AAH56418  | 1  | 15% / 9  | 23% / 14 |
| 51 | Membrane alanine aminopeptidase, precursor                      | AAH58928  | 1  | 17% / 13 | 18% / 19 |
| 52 | MEMD protein                                                    | CAA71256  | 1  | 26% / 10 | 13% / 9  |
| 53 | MHC class I antigen                                             | AAT27438  | 0  | 29% / 6  | 20% / 3  |
| 54 | MSTP065                                                         | AAQ13585  | 1  | 7% / 1   | 14% / 1  |
| 55 | MSTP086                                                         | AAQ13609  | 6  | 11% / 5  | 4% / 3   |
| 56 | myoferlin                                                       | AAF27177  | 1  | 10% / 18 | 11% / 20 |
| 57 | Na+/K+ -ATPase alpha 1 subunit                                  | AAH50359  | 10 | 28% / 24 | 16% / 9  |
| 58 | neutral amino acid transporter                                  | AAD09814  | 9  | 7% / 3   | 14% / 7  |
| 59 | Nicalin                                                         | AAH13283  | 2  | 17% / 8  | 15% / 7  |
| 60 | Niemann-Pick disease, type C1                                   | NP_000262 | 12 | 2% / 3   | 4% / 5   |
| 61 | NSEP1 protein                                                   | AAH00064  | 0  | 31% / 5  | 10% / 2  |
| 62 | nucleolin                                                       | NP_005372 | 0  | 9% / 6   | 6% / 3   |
| 63 | p120 catenin isoform 2B                                         | AAC39810  | 0  | 7% / 6   | 7% / 6   |
| 64 | p25                                                             | AAL35268  | 1  | 32% / 7  | 25% / 7  |
| 65 | p76                                                             | AAB38973  | 9  | 13% / 7  | 6% / 6   |
| 66 | PCYOX1 protein                                                  | AAH07029  | 0  | 3% / 1   | 13% / 5  |
| 67 | peroxisomal membrane protein, 70K                               | S20313    | 3  | 9% / 6   | 23% / 13 |
| 68 | pituitary tumor-transforming gene protein binding factor        | AAF73770  | 0  | 10% / 1  | 6% / 1   |
| 69 | pM5 (3' partial)                                                | AAC15783  | 0  | 4% / 4   | 14% / 15 |
| 70 | porin                                                           | AAA60145  | 0  | 29% / 7  | 33% / 10 |
| 71 | Porin 31HM                                                      | AAB20246  | 0  | 38% / 8  | 35% / 9  |
| 72 | prohibitin                                                      | NP_002625 | 0  | 34% / 7  | 54% / 16 |
| 73 | pro-ubiquitin                                                   | AAA36788  | 0  | 36% / 5  | 24% / 4  |
| 74 | putative 40-9-1 protein                                         | CAC51434  | 9  | 4% / 1   | 10% / 3  |

|     |                                                                                   |           |   |          |          |
|-----|-----------------------------------------------------------------------------------|-----------|---|----------|----------|
| 75  | rab1B                                                                             | AAP97212  | 0 | 43% / 7  | 66% / 13 |
| 76  | RAB6A, member RAS oncogene family, isoform a                                      | AAH03617  | 0 | 39% / 8  | 32% / 9  |
| 77  | RAB7 protein                                                                      | AAH08721  | 0 | 44% / 8  | 56% / 11 |
| 78  | reductase,NADH cytochrome b5 related RAS viral (r-ras) oncogene homolog           | 1203280A  | 0 | 29% / 5  | 24% / 9  |
| 79  | homolog                                                                           | AAP35451  | 0 | 17% / 2  | 10% / 2  |
| 80  | RER1 protein                                                                      | AAF67490  | 3 | 22% / 4  | 13% / 3  |
| 81  | Ribophorin I                                                                      | AAH10839  | 1 | 37% / 18 | 50% / 29 |
| 82  | ribophorin II precursor                                                           | B26168    | 4 | 19% / 10 | 10% / 6  |
| 83  | ribosomal protein L7                                                              | CAA41027  | 0 | 18% / 4  | 26% / 9  |
| 84  | ribosomal protein L7a; 60S ribosomal protein L7a                                  | NP_000963 | 0 | 26% / 6  | 32% / 9  |
| 85  | ribosomal protein L9, cytosolic                                                   | S65792    | 0 | 18% / 2  | 5% / 1   |
| 86  | ribosomal protein S2; 40S ribosomal protein S2                                    | NP_002943 | 6 | 18% / 4  | 14% / 5  |
| 87  | scar protein                                                                      | AAA36597  | 0 | 32% / 8  | 7% / 2   |
| 88  | scribble                                                                          | AAL38976  | 0 | 4% / 5   | 3% / 5   |
| 89  | signal recognition particle receptor beta subunit                                 | AAP97144  | 1 | 15% / 3  | 38% / 8  |
| 90  | signal sequence receptor, alpha; TRAP alpha                                       | NP_003135 | 1 | 13% / 5  | 9% / 2   |
| 91  | Similar to AFG3 ATPase family gene 3-like 2 (yeast)                               | AAH24282  | 2 | 5% / 4   | 16% / 15 |
| 92  | similar to vesicle trafficking protein sec22b                                     | XP_227499 | 1 | 46% / 8  | 20% / 5  |
| 93  | SLC25A3 protein                                                                   | AAH15379  | 2 | 21% / 8  | 16% / 5  |
| 94  | Solute carrier family 25 (mitochondrial carrier; oxoglutarate carrier), member 11 | AAH06519  | 0 | 8% / 2   | 9% / 2   |
| 95  | Solute carrier family 25, member 5                                                | AAH56160  | 2 | 54% / 16 | 33% / 13 |
| 96  | Steroid dehydrogenase homolog                                                     | AAH12043  | 3 | 32% / 6  | 34% / 10 |
| 97  | surface 4 integral membrane protein                                               | CAA75099  | 5 | 9% / 3   | 7% / 2   |
| 98  | syntaxin 7                                                                        | AAC51851  | 1 | 25% / 7  | 24% / 5  |
| 99  | transferrin receptor                                                              | NP_003225 | 1 | 39% / 26 | 31% / 21 |
| 100 | transforming protein rap2b                                                        | TVHUR2    | 0 | 10% / 2  | 12% / 2  |
| 101 | translation elongation factor 1 alpha 1-like 14                                   | AAK93966  | 0 | 24% / 7  | 7% / 3   |
| 102 | translocating chain-associating membrane protein                                  | AAP36023  | 8 | 12% / 4  | 9% / 3   |
| 103 | Transmembrane trafficking protein                                                 | AAH01825  | 2 | 21% / 5  | 13% / 3  |
| 104 | tubulin alpha                                                                     | CAA25855  | 0 | 16% / 6  | 8% / 3   |
| 105 | tubulin Beta 5                                                                    | AAH20946  | 0 | 15% / 6  | 2% / 1   |
| 106 | Tumor-associated calcium signal transducer 1 precursor                            | P16422    | 1 | 14% / 3  | 10% / 4  |
| 107 | Ubiquinol-cytochrome-c reductase complex core protein I                           | P31930    | 0 | 6% / 2   | 3% / 1   |
| 108 | unknown                                                                           | AAQ96872  | 1 | 19% / 4  | 7% / 2   |
| 109 | unnamed protein product                                                           | CAA68486  | 0 | 24% / 8  | 7% / 4   |
| 110 | unnamed protein product                                                           | BAA91764  | 0 | 18% / 11 | 25% / 17 |
| 111 | VAMP-associated 33 kDa protein                                                    | AAF67013  | 1 | 13% / 4  | 14% / 4  |

|     |                                        |           |    |          |         |
|-----|----------------------------------------|-----------|----|----------|---------|
| 112 | WS beta-transducin repeats protein     | AAD28083  | 0  | 14% / 6  | 7% / 3  |
| 113 | YPT3                                   | CAA56176  | 0  | 20% / 5  | 15% / 3 |
| 114 | glycoprotein, synaptic 2               | AAP35843  | 4  | 16% / 5  | 21% / 8 |
|     | lysosomal-associated membrane          |           |    |          |         |
| 115 | glycoprotein-1                         | AAF66141  | 1  | 7% / 3   | 18% / 7 |
| 116 | 60S ribosomal protein L15              | AAG44837  | 0  | 39% / 8  | N/A     |
| 117 | Annexin A2, isoform 2                  | AAH23990  | 0  | 28% / 8  | N/A     |
|     | Asparagine-linked glycosylation 3      |           |    |          |         |
| 118 | homolog                                | AAH02839  | 7  | 10% / 4  | N/A     |
|     | ATP synthase, H+ transporting,         |           |    |          |         |
| 119 | mitochondrial F0 complex, subunit f    | NP_004880 | 1  | 25% / 2  | N/A     |
| 120 | B-cell receptor-associated protein 31  | AAH14323  | 2  | 26% / 5  | N/A     |
| 121 | calumenin                              | AAB97725  | 0  | 13% / 4  | N/A     |
|     | catechol-O-methyltransferase isoform   |           |    |          |         |
| 122 | MB-COMT                                | NP_000745 | 1  | 16% / 3  | N/A     |
| 123 | caveolin 1                             | AAR16246  | 1  | 34% / 4  | N/A     |
|     | Chain A, Crystal Structure Of Protein  |           |    |          |         |
| 124 | Tyrosine Phosphatase 1b                | 1C86A     | 0  | 6% / 2   | N/A     |
| 125 | Coated vesicle membrane protein        | AAH25957  | 2  | 21% / 4  | N/A     |
|     | Cytochrome b5 outer mitochondrial      |           |    |          |         |
| 126 | membrane isoform precursor             | O43169    | 1  | 30% / 2  | N/A     |
|     | Dehydrogenase/reductase (SDR family)   |           |    |          |         |
| 127 | member 7                               | AAH00637  | 1  | 38% / 13 | N/A     |
| 128 | differentiation-dependent A4 protein   | AAA35499  | 4  | 9% / 1   | N/A     |
| 129 | hypothetical protein PRO1855           | NP_060979 | 1  | 53% / 16 | N/A     |
| 130 | integrin alpha 3 isoform b, precursor  | NP_005492 | 2  | 2% / 4   | N/A     |
|     | interleukin 1 receptor-like 1 ligand   |           |    |          |         |
| 131 | precursor                              | NP_006849 | 1  | 3% / 1   | N/A     |
| 132 | junction adhesion molecule             | AAD43794  | 1  | 12% / 4  | N/A     |
| 133 | KIAA0573 protein                       | BAA25499  | 0  | 10% / 4  | N/A     |
| 134 | KIAA0887 protein                       | BAA74910  | 0  | 8% / 3   | N/A     |
| 135 | KIAA1363 protein                       | BAA92601  | 0  | 11% / 5  | N/A     |
|     | LAG1 longevity assurance homolog 2,    |           |    |          |         |
| 136 | isoform 1                              | AAH10032  | 5  | 9% / 2   | N/A     |
| 137 | laminin receptor homolog               | AAB22173  | 0  | 25% / 3  | N/A     |
|     | lysosome-associated membrane           |           |    |          |         |
| 138 | protein-3 variant                      | AAM34259  | 3  | 9% / 2   | N/A     |
| 139 | Mal, T-cell differentiation protein 2  | AAH12367  | 4  | 6% / 1   | N/A     |
| 140 | MBC3205                                | AAQ89308  | 4  | 20% / 3  | N/A     |
|     | mel transforming oncogene (derived     |           |    |          |         |
| 141 | from cell line NK14)- RAB8 homolog     | AAP35848  | 0  | 17% / 3  | N/A     |
|     | MHC class I histocompatibility antigen |           |    |          |         |
| 142 | HLA-A28 alpha chain                    | HLHU28    | 0  | 9% / 3   | N/A     |
| 143 | microsomal glutathione S-transferase 1 | AAQ55111  | 1  | 27% / 4  | N/A     |
| 144 | moesin                                 | NP_002435 | 0  | 16% / 11 | N/A     |
| 145 | Monocarboxylate transporter 4          | O15427    | 12 | 4% / 2   | N/A     |
| 146 | multidrug resistance protein           | AAA50612  | 0  | 16% / 3  | N/A     |
| 147 | Nogo-A protein                         | CAB99248  | 2  | 5% / 5   | N/A     |
| 148 | Phosphatidylserine synthase 1          | AAH04390  | 9  | 2% / 1   | N/A     |
| 149 | Prion protein                          | AAB59442  | 0  | 9% / 2   | N/A     |

|     |                                                                                           |           |    |         |        |
|-----|-------------------------------------------------------------------------------------------|-----------|----|---------|--------|
| 150 | Progesterone membrane binding protein                                                     | AAH16692  | 1  | 22% / 2 | N/A    |
| 151 | protein disulfide isomerase-related protein 5                                             | AAB50217  | 0  | 8% / 3  | N/A    |
| 152 | protein tyrosine phosphatase, receptor type, F isoform 1 precursor                        | NP_002831 | 1  | 5% / 9  | N/A    |
| 153 | ras-like protein                                                                          | AAA36544  | 0  | 30% / 5 | N/A    |
| 154 | reticulon 3-A                                                                             | AAR02474  | 3  | 2% / 3  | N/A    |
| 155 | retroviral receptor                                                                       | S29685    | 14 | 5% / 3  | N/A    |
| 156 | ribosomal protein L12; 60S ribosomal protein L12                                          | NP_000967 | 0  | 14% / 2 | N/A    |
| 157 | ribosomal protein L18a; 60S ribosomal protein L18a                                        | NP_000971 | 0  | 17% / 3 | N/A    |
| 158 | ribosomal protein L3; 60S ribosomal protein L3; HIV-1 TAR RNA-binding protein B           | NP_000958 | 0  | 26% / 9 | N/A    |
| 159 | ribosomal protein L4; 60S ribosomal protein L4; homologue of Xenopus ribosomal protein L1 | NP_000959 | 0  | 28% / 9 | N/A    |
| 160 | Ribosomal protein L6                                                                      | AAH31009  | 0  | 29% / 6 | N/A    |
| 161 | ribosomal protein S17; 40S ribosomal protein S17                                          | NP_001012 | 0  | 16% / 1 | N/A    |
| 162 | ribosomal protein S5                                                                      | BAA25815  | 0  | 47% / 2 | N/A    |
| 163 | S100 calcium binding protein A14                                                          | AAH05019  | 0  | 25% / 2 | N/A    |
| 164 | S100 calcium binding protein A16                                                          | AAH19099  | 0  | 15% / 2 | N/A    |
| 165 | sarco-/endoplasmic reticulum Ca-ATPase 3                                                  | AAC24525  | 8  | 6% / 7  | N/A    |
| 166 | signal sequence receptor gamma subunit                                                    | NP_009038 | 4  | 20% / 3 | N/A    |
| 167 | signal sequence receptor, delta; translocon-associated protein delta                      | NP_006271 | 0  | 31% / 4 | N/A    |
| 168 | specific 116-kDa vacuolar proton pump subunit                                             | AAA97878  | 8  | 9% / 6  | N/A    |
| 169 | TIRAP3b                                                                                   | AAQ97433  | 0  | 17% / 5 | N/A    |
| 170 | Transmembrane 9 superfamily protein member 4                                              | AAH21107  | 9  | 6% / 3  | N/A    |
| 171 | ubiquinol-cytochrome-c reductase (EC 1.10.2.2) cytochrome c1 precursor                    | S00680    | 0  | 16% / 4 | N/A    |
| 172 | Unknown (protein for IMAGE:3543815)                                                       | AAH20169  | 0  | 25% / 5 | N/A    |
| 173 | Unknown (protein for MGC:71373)                                                           | AAH63378  | 0  | 24% / 6 | N/A    |
| 174 | unnamed protein product                                                                   | BAB14065  | 0  | 6% / 2  | N/A    |
| 175 | unnamed protein product                                                                   | BAB55370  | 0  | 10% / 3 | N/A    |
| 176 | unnamed protein product                                                                   | BAB71043  | 0  | 8% / 3  | N/A    |
| 177 | VDAC3, Voltage-dependent anion channel 3                                                  | AAH56870  | 0  | 22% / 6 | N/A    |
| 178 | Vesicle-associated membrane protein-associated protein A, isoform 2                       | AAH02992  | 1  | 48% / 9 | N/A    |
| 179 | 2-oxoglutarate carrier                                                                    | CAA46905  | 0  | N/A     | 7% / 2 |
| 180 | 30 kDa protein                                                                            | AAH22807  | 2  | N/A     | 6% / 1 |
| 181 | 3-phosphoglycerate dehydrogenase                                                          | AAB88664  | 0  | N/A     | 9% / 5 |
| 182 | 5'-nucleotidase                                                                           | CAA39271  | 1  | N/A     | 9% / 4 |

|     |                                                                                      |           |    |     |          |
|-----|--------------------------------------------------------------------------------------|-----------|----|-----|----------|
| 183 | 5T4 oncofetal trophoblast glycoprotein                                               | AAH37161  | 1  | N/A | 9% / 3   |
| 184 | aldehyde dehydrogenase 3A2                                                           | NP_000373 | 1  | N/A | 9% / 4   |
| 185 | Alpha-1,6-mannosyl-glycoprotein beta-1,2-N-acetylglucosaminyltransferase             | AAH06390  | 1  | N/A | 4% / 2   |
| 186 | antigen CD9                                                                          | AAA51958  | 0  | N/A | 33% / 1  |
| 187 | aralar2                                                                              | CAB62206  | 0  | N/A | 21% / 13 |
| 188 | aspartyl(asparaginy)l-beta-hydroxylase                                               | AAB50779  | 1  | N/A | 14% / 11 |
| 189 | ATP synthase, H <sup>+</sup> transporting, mitochondrial F1 complex                  | NP_005165 | 0  | N/A | 8% / 3   |
| 190 | ATPase, Na <sup>+</sup> /K <sup>+</sup> transporting, beta 1 polypeptide             | AAP88789  | 1  | N/A | 17% / 6  |
| 191 | bA217H1.1 (similar to N33 protein)                                                   | CAC36035  | 4  | N/A | 9% / 2   |
| 192 | brain-selective and closely mapped on the counter allele of CMAP in cystatin cluster | BAB11885  | 1  | N/A | 4% / 2   |
| 193 | bullous pemphigoid antigen                                                           | AAA35606  | 0  | N/A | 2% / 5   |
| 194 | C-1-tetrahydrofolate synthase, cytoplasmic (C1-THF synthase)                         | P11586    | 0  | N/A | 8% / 7   |
| 195 | Ca ATPase SERCA1                                                                     | 2204260A  | 7  | N/A | 2% / 3   |
| 196 | Calcium-binding protein p22 (Calcium-binding protein CHP)                            | Q99653    | 0  | N/A | 25% / 4  |
| 197 | calnexin                                                                             | I53260    | 1  | N/A | 6% / 3   |
| 198 | calreticulin precursor                                                               | NP_004334 | 0  | N/A | 23% / 9  |
| 199 | carboxypeptidase D                                                                   | AAC51775  | 2  | N/A | 6% / 8   |
| 200 | catenin (cadherin-associated protein), beta 1, 88kDa                                 | NP_001895 | 0  | N/A | 4% / 3   |
| 201 | CD81 antigen                                                                         | AAH02978  | 4  | N/A | 8% / 1   |
| 202 | CD97                                                                                 | AAB36682  | 7  | N/A | 9% / 6   |
| 203 | cell surface glycoprotein P1H12 precursor                                            | AAD17799  | 1  | N/A | 6% / 4   |
| 204 | cellular apoptosis susceptibility protein                                            | AAC35008  | 0  | N/A | 3% / 4   |
| 205 | CGI-08 protein                                                                       | AAD27717  | 6  | N/A | 5% / 2   |
| 206 | CGI-49 protein                                                                       | AAD34044  | 1  | N/A | 10% / 3  |
| 207 | Chain A, Human Rap1a, Residues 1-167, Double Mutant (E30d,K31e)                      | 1GUAA     | 0  | N/A | 13% / 2  |
| 208 | CKAP4 protein                                                                        | AAH67357  | 1  | N/A | 57% / 32 |
| 209 | Clathrin heavy chain 1                                                               | AAH54489  | 0  | N/A | 12% / 18 |
| 210 | CLIC1                                                                                | AAD18073  | 0  | N/A | 29% / 6  |
| 211 | CTL2 protein                                                                         | CAB75542  | 10 | N/A | 5% / 3   |
| 212 | CUB domain containing protein 1                                                      | AAK02058  | 1  | N/A | 3% / 3   |
| 213 | cytochrome C oxidase II subunit                                                      | CAA39187  | 1  | N/A | 9% / 2   |
| 214 | Cytochrome c oxidase subunit Va, precursor                                           | AAH24240  | 0  | N/A | 6% / 1   |
| 215 | cytochrome-c oxidase (EC 1.9.3.1) chain Vb precursor                                 | OTHU5B    | 0  | N/A | 19% / 4  |
| 216 | E-cadherin                                                                           | CAA79356  | 1  | N/A | 3% / 3   |
| 217 | Elongation factor 2 (EF-2)                                                           | P13639    | 0  | N/A | 4% / 5   |
| 218 | endobrevin                                                                           | AAC08434  | 1  | N/A | 18% / 2  |
| 219 | endothelial and smooth muscle cell-derived neuropilin-like protein                   | AAL30178  | 1  | N/A | 4% / 3   |

|     |                                                           |           |    |     |          |
|-----|-----------------------------------------------------------|-----------|----|-----|----------|
| 220 | fatty acid transport protein                              | AAD11623  | 2  | N/A | 10% / 6  |
| 221 | galactose-specific lectin                                 | AAA88086  | 0  | N/A | 14% / 3  |
| 222 | GIQT3049                                                  | AAQ89385  | 1  | N/A | 12% / 3  |
| 223 | glucosidase I                                             | CAD19636  | 1  | N/A | 14% / 11 |
| 224 | golgi antigen gcp372                                      | CAD19636  | 1  | N/A | 0% / 3   |
| 225 | Golgi autoantigen, golgin subfamily a, 5                  | AAH23021  | 1  | N/A | 12% / 9  |
| 226 | Golgi phosphoprotein 2                                    | AAH01740  | 1  | N/A | 15% / 7  |
| 227 | golgi phosphoprotein 4; type II Golgi membrane protein    | NP_055313 | 1  | N/A | 3% / 2   |
| 228 | GOSR1 protein                                             | AAH12620  | 2  | N/A | 12% / 2  |
| 229 | GTP-binding protein Rab2                                  | B34323    | 0  | N/A | 12% / 2  |
| 230 | heat shock 70kDa protein 1A                               | NP_005336 | 0  | N/A | 18% / 12 |
| 231 | heat shock protein 90-alpha                               | HHHU86    | 0  | N/A | 14% / 11 |
| 232 | heat shock protein gp96 precursor                         | AAK74072  | 0  | N/A | 17% / 12 |
| 233 | HNRPU protein                                             | AAH15782  | 0  | N/A | 12% / 9  |
| 234 | HSPC041 protein                                           | AAD39919  | 0  | N/A | 10% / 1  |
| 235 | hypothetical protein                                      | CAD39032  | 1  | N/A | 5% / 2   |
| 236 | hypothetical protein                                      | CAD39094  | 0  | N/A | 18% / 8  |
| 237 | integral nuclear envelope inner membrane protein          | AAA59495  | 8  | N/A | 10% / 5  |
| 238 | integrin alpha 6                                          | AAD48469  | 1  | N/A | 12% / 11 |
| 239 | intercellular adhesion molecule 1 (CD54)                  | AAP35500  | 1  | N/A | 18% / 9  |
| 240 | ITGB2 protein                                             | AAH05861  | 1  | N/A | 13% / 8  |
| 241 | KIAA0118                                                  | BAA07682  | 0  | N/A | 18% / 2  |
| 242 | KIAA0315                                                  | BAA21571  | 0  | N/A | 5% / 12  |
| 243 | KIAA0747 protein                                          | AAH04998  | 2  | N/A | 28% / 26 |
| 244 | KIAA0761 protein                                          | BAA34481  | 3  | N/A | 7% / 4   |
| 245 | KIAA0792 protein                                          | BAA34512  | 11 | N/A | 3% / 3   |
| 246 | KIAA1228 protein                                          | EAL23931  | 1  | N/A | 8% / 6   |
| 247 | KIAA1708                                                  | BAB21799  | 0  | N/A | 2% / 6   |
| 248 | KIAA1715 protein                                          | BAB21806  | 2  | N/A | 10% / 4  |
| 249 | lanosterol 14-alpha demethylase                           | AAC50951  | 1  | N/A | 20% / 10 |
| 250 | Leucine zipper-EF-hand containing transmembrane protein 1 | AAH21208  | 1  | N/A | 6% / 5   |
| 251 | leucine-rich PPR motif-containing protein                 | AAP41922  | 0  | N/A | 3% / 6   |
| 252 | Leukocyte surface antigen CD47 precursor                  | Q08722    | 6  | N/A | 5% / 2   |
| 253 | low-Mr GTP-binding protein Rab32                          | AAB02833  | 0  | N/A | 10% / 2  |
| 254 | lysosomal membrane glycoprotein-2                         | AAA60383  | 1  | N/A | 4% / 2   |
| 255 | Mesenchymal stem cell protein DSCD75                      | AAH01311  | 1  | N/A | 9% / 2   |
| 256 | Microsomal signal peptidase 25 kDa subunit                | Q15005    | 2  | N/A | 19% / 5  |
| 257 | mitochondrial carrier homolog 2; 2310034D24Rik            | NP_055157 | 0  | N/A | 7% / 3   |
| 258 | My009 protein                                             | AAG43122  | 2  | N/A | 13% / 6  |
| 259 | MYO1C protein                                             | AAH44891  | 0  | N/A | 16% / 15 |
| 260 | myosin IB; myosin-I alpha                                 | NP_036355 | 0  | N/A | 21% / 20 |



|     |                                                                                    |           |    |     |          |
|-----|------------------------------------------------------------------------------------|-----------|----|-----|----------|
| 261 | myristoylated alanine-rich C-kinase substrate                                      | AAA59555  | 0  | N/A | 24% / 4  |
| 262 | Neural cell adhesion molecule L1 neuroblastoma RAS viral (v-ras)                   | CAA42508  | 1  | N/A | 1% / 1   |
| 263 | oncogene homolog                                                                   | NP_002515 | 0  | N/A | 12% / 2  |
| 264 | neuropathy target esterase                                                         | AAH38229  | 1  | N/A | 4% / 5   |
| 265 | neuropilin                                                                         | AAC51759  | 1  | N/A | 9% / 7   |
| 266 | neutrophil lipocalin                                                               | AAD14168  | 0  | N/A | 30% / 5  |
| 267 | nucleoporin 210; nuclear pore membrane glycoprotein 210                            | NP_079199 | 2  | N/A | 4% / 7   |
| 268 | Oligosaccharyl transferase STT3 subunit homolog (B5) (Integral membrane protein 1) | P46977    | 13 | N/A | 6% / 5   |
| 269 | oxytocinase splice variant 2                                                       | AAB66673  | 1  | N/A | 9% / 10  |
| 270 | p53 inducible protein                                                              | NP_055191 | 0  | N/A | 2% / 3   |
| 271 | PAI-RBP1 protein                                                                   | AAH08045  | 0  | N/A | 9% / 4   |
| 272 | phosphatidylinositol glycan class S plasma membrane calcium ATPase isoform 1       | AAD09925  | 7  | N/A | 10% / 8  |
| 274 | Podocalyxin-like protein 1 precursor                                               | O00592    | 1  | N/A | 3% / 2   |
| 275 | polypeptide N-acetylgalactosaminyltransferase 2                                    | NP_004472 | 1  | N/A | 21% / 10 |
| 276 | polypeptide N-acetylgalactosaminyltransferase 3                                    | NP_004473 | 1  | N/A | 12% / 6  |
| 277 | progesterone receptor membrane component 1                                         | NP_006658 | 1  | N/A | 16% / 5  |
| 278 | Prolyl 4-hydroxylase, beta subunit                                                 | AAH71892  | 0  | N/A | 18% / 12 |
| 279 | protein disulfide-isomerase (EC 5.3.4.1) ER60 precursor                            | S55507    | 0  | N/A | 29% / 17 |
| 280 | protein ERGIC-53                                                                   | 1919261A  | 1  | N/A | 6% / 5   |
| 281 | Protein kinase C substrate, 80 kDa protein, heavy chain (PKCSH) (80K-H protein)    | P14314    | 0  | N/A | 7% / 4   |
| 282 | RAB18, member RAS oncogene family                                                  | AAP88842  | 0  | N/A | 16% / 3  |
| 283 | RAB34 protein                                                                      | AAH16841  | 0  | N/A | 8% / 2   |
| 284 | RAB5A, member RAS oncogene family                                                  | AAH18288  | 0  | N/A | 26% / 4  |
| 285 | Ras-GTPase-activating protein SH3-domain-binding protein                           | AAH06997  | 0  | N/A | 9% / 3   |
| 286 | Receptor protein-tyrosine kinase erbB-4 precursor (p180erbB4)                      | Q15303    | 2  | N/A | 2% / 3   |
| 287 | repressor of estrogen receptor activity                                            | AAP86652  | 0  | N/A | 32% / 9  |
| 288 | retinoic acid induced 3; retinoic acid responsive gene                             | NP_003970 | 7  | N/A | 3% / 1   |
| 289 | ribosomal protein homologous to yeast S24                                          | CAA44568  | 0  | N/A | 14% / 2  |
| 290 | ribosomal protein L10a                                                             | BAC16802  | 0  | N/A | 15% / 5  |
| 291 | ribosomal protein L18; 60S ribosomal protein L18                                   | NP_000970 | 0  | N/A | 28% / 5  |
| 292 | ribosomal protein L24; 60S ribosomal protein L24                                   | NP_000977 | 0  | N/A | 26% / 5  |

|     |                                                                      |           |    |     |          |
|-----|----------------------------------------------------------------------|-----------|----|-----|----------|
| 293 | ribosomal protein L35a; 60S ribosomal protein L35a                   | NP_000987 | 0  | N/A | 16% / 3  |
| 294 | ribosomal protein L8; 60S ribosomal protein L8                       | NP_150644 | 0  | N/A | 15% / 4  |
| 295 | ribosomal protein S26                                                | CAA49345  | 0  | N/A | 20% / 2  |
| 296 | ribosomal protein S3                                                 | AAA18095  | 0  | N/A | 37% / 3  |
| 297 | Ribosomal protein S6                                                 | AAH13296  | 0  | N/A | 32% / 12 |
| 298 | ribosomal protein S8; 40S ribosomal protein S8                       | NP_001003 | 0  | N/A | 13% / 2  |
| 299 | ribosomal protein S9, cytosolic                                      | S55917    | 0  | N/A | 14% / 3  |
| 300 | RRBP1 protein                                                        | AAH00099  | 0  | N/A | 5% / 3   |
| 301 | ryanodine receptor 1 (skeletal)                                      | NP_000531 | 6  | N/A | 0% / 6   |
| 302 | sarcolectin                                                          | CAB41416  | 0  | N/A | 16% / 8  |
| 303 | scavenger receptor class B type III                                  | AAQ08185  | 1  | N/A | 8% / 4   |
| 304 | SDIG243                                                              | AAQ89177  | 5  | N/A | 9% / 3   |
| 305 | secretory carrier membrane protein                                   | AAB62724  | 4  | N/A | 12% / 3  |
| 306 | Sel-1 homolog precursor (Suppressor of lin-12-like protein) (Sel-1L) | Q9UBV2    | 1  | N/A | 10% / 6  |
| 307 | serine palmitoyltransferase subunit 1 isoform a                      | NP_006406 | 2  | N/A | 5% / 2   |
| 308 | serine protease TADG15 [Homo sapiens]                                | AAG15395  | 1  | N/A | 3% / 2   |
| 309 | SLC38A1 protein                                                      | AAH10620  | 11 | N/A | 5% / 3   |
| 310 | small GTP binding protein Rab7                                       | AAA86640  | 0  | N/A | 21% / 4  |
| 311 | Solute carrier family 2, facilitated glucose transporter, member 1   | P11166    | 12 | N/A | 6% / 5   |
| 312 | sphingosine-1-phosphate lyase                                        | CAA09590  | 0  | N/A | 24% / 14 |
| 313 | synaptophysin homolog                                                | S20316    | 1  | N/A | 7% / 1   |
| 314 | syntaxin 10                                                          | JC5922    | 1  | N/A | 10% / 2  |
| 315 | syntaxin 8                                                           | AAD20831  | 1  | N/A | 7% / 2   |
| 316 | TGN46                                                                | CAA64002  | 1  | N/A | 3% / 3   |
| 317 | thioredoxin peroxidase                                               | NP_006397 | 0  | N/A | 4% / 1   |
| 318 | Thrombospondin 1 precursor                                           | P07996    | 0  | N/A | 4% / 5   |
| 319 | transcriptional coactivator ALY                                      | AAD09608  | 0  | N/A | 4% / 1   |
| 320 | transmembrane glycoprotein                                           | CAB61878  | 1  | N/A | 8% / 5   |
| 321 | transmembrane protein 33                                             | NP_060596 | 1  | N/A | 18% / 5  |
| 322 | transmembrane protein TM9SF3                                         | AAF98159  | 9  | N/A | 3% / 3   |
| 323 | tumor-associated calcium signal transducer 2                         | AAP35919  | 1  | N/A | 8% / 2   |
| 324 | unknown                                                              | AAC25388  | 2  | N/A | 19% / 5  |
| 325 | unnamed protein product                                              | BAC04810  | 1  | N/A | 5% / 6   |
| 326 | unnamed protein product                                              | BAC11702  | 0  | N/A | 16% / 14 |
| 327 | unnamed protein product                                              | CAA25086  | 0  | N/A | 9% / 2   |
| 328 | vacuolar protein sorting                                             | CAB40417  | 0  | N/A | 7% / 5   |
| 329 | Vacuolar proton translocating ATPase 116 kDa subunit a isoform 2     | Q9Y487    | 6  | N/A | 11% / 10 |
| 330 | vacuolar sorting protein 35                                          | AAF89953  | 0  | N/A | 5% / 4   |
| 331 | Villin 2                                                             | AAH68458  | 0  | N/A | 18% / 13 |

# Supplementary Figure S1

(A)

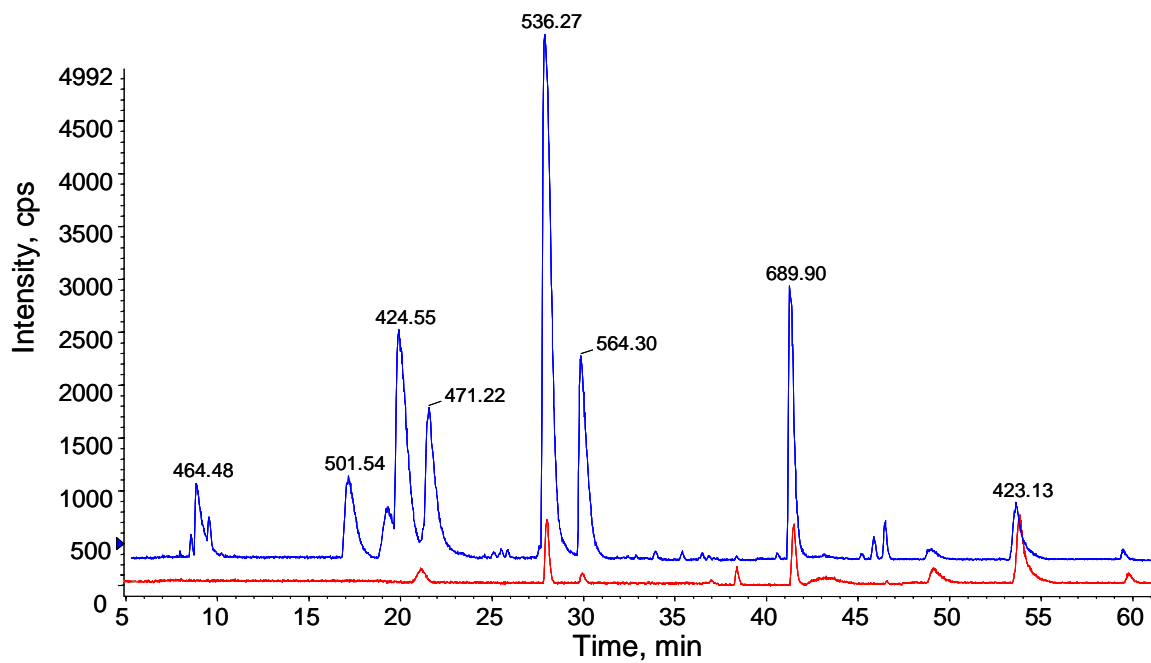

(B)

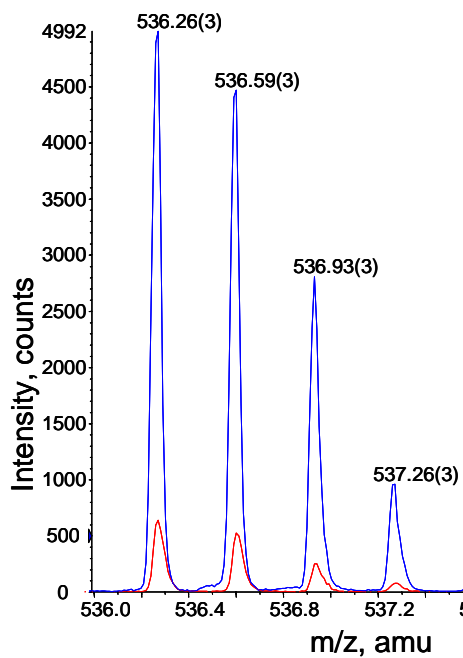

(C)

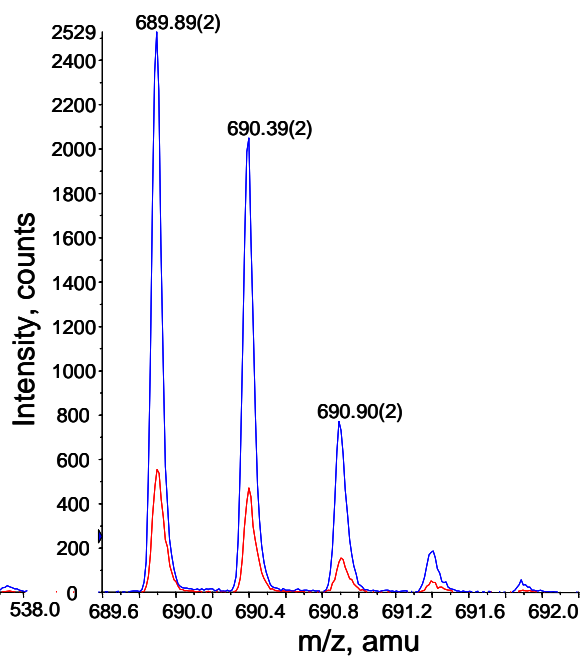

Supplementary Figure S2

(A)

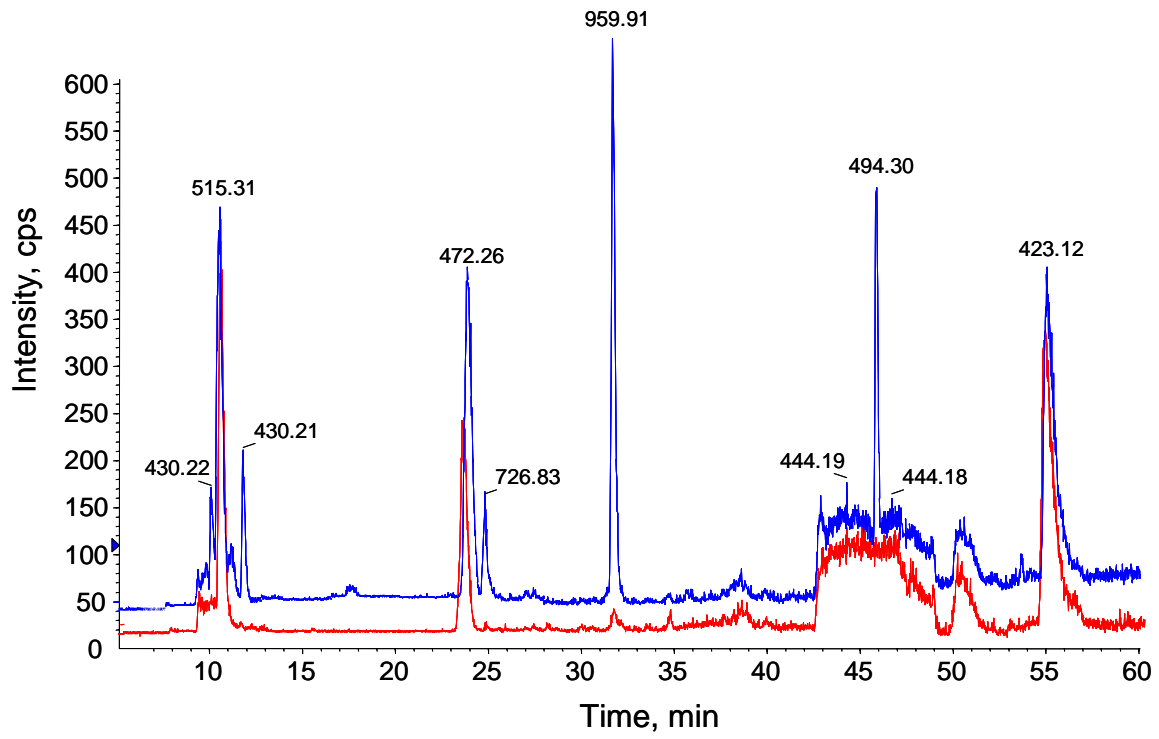

(B)

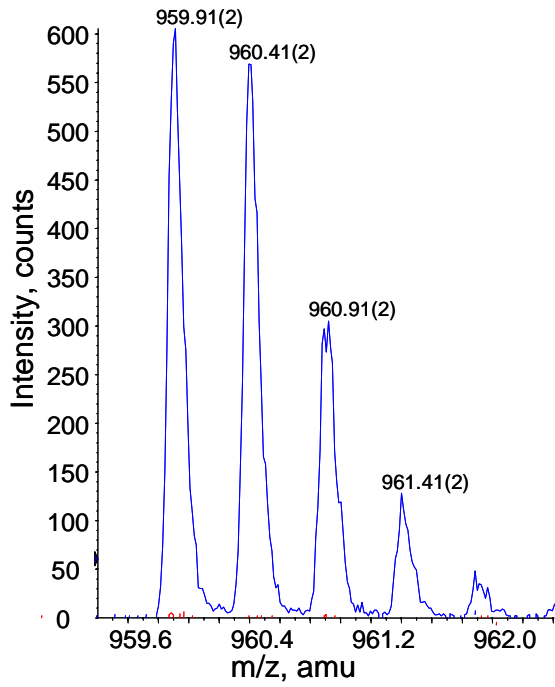

(C)

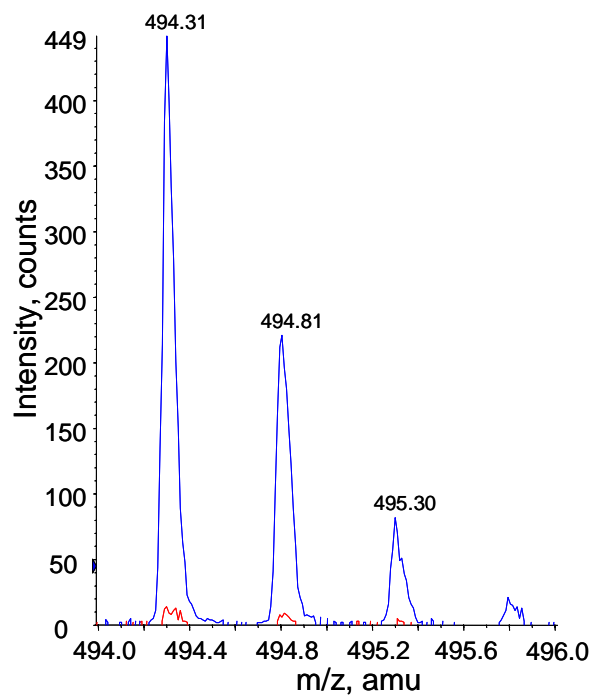

Supplement: NIHMS7357-supplement-supplementary.pdf [file NIHMS7357-supplement-supplementary.pdf]
